# Supplementary material for: Comprehensive Analysis of miRNAs and Target mRNAs between Immature and Mature Testis Tissue in Chinese Red Steppes Cattle
Source: MDPI journal article supplement (doi:10.3390/ani11113024), 2021-10-21
Supplement: s1 [file s1]

**Table S1.** The real-time PCR primers of DEGs and DERs

| Symbol          | Sequence ID | Primer name | Sequence (5'-3')                              |
|-----------------|-------------|-------------|-----------------------------------------------|
| bta-miR-369-5p  | MI0005020   | RT-Primer   | CTCAACTGGTGTCGTGGAGTCGGCAATTCAGTTGAGAAAGATCA  |
|                 |             | F-Primer    | ACACTCCAGCTGGGAATAATACATGGTTG                 |
|                 |             | R-Primer    | TGGTGTCGTGGAGTCG                              |
| bta-miR-376e    | MI0022290   | RT-Primer   | CTCAACTGGTGTCGTGGAGTCGGCAATTCAGTTGAGAATGTGGA  |
|                 |             | F-Primer    | ACACTCCAGCTGGGAACATAGAGGAAAATC                |
|                 |             | R-Primer    | TGGTGTCGTGGAGTCG                              |
| bta-miR-382     | MI0009822   | RT-Primer   | CTCAACTGGTGTCGTGGAGTCGGCAATTCAGTTGAG CGAATCCA |
|                 |             | F-Primer    | ACACTCCAGCTGGGGAAGTTGTTCGTGGTG                |
|                 |             | R-Primer    | TGGTGTCGTGGAGTCG                              |
| bta-miR-3578    | MI0015945   | RT-Primer   | CTCAACTGGTGTCGTGGAGTCGGCAATTCAGTTGAG GAAGTTGT |
|                 |             | F-Primer    | ACACTCCAGCTGGGGAATCCACCACGAAC                 |
|                 |             | R-Primer    | TGGTGTCGTGGAGTCG                              |
| bta-miR-432     | MI0009831   | RT-Primer   | CTCAACTGGTGTCGTGGAGTCGGCAATTCAGTTGAG CCACCCTT |
|                 |             | F-Primer    | ACACTCCAGCTGGGTCTTGGAGTAGGTCATT               |
|                 |             | R-Primer    | TGGTGTCGTGGAGTCG                              |
| bta-miR-411c-5p | MI0022292   | RT-Primer   | CTCAACTGGTGTCGTGGAGTCGGCAATTCAGTTGAGAATGTATG  |
|                 |             | F-Primer    | ACACTCCAGCTGGGGGTTGATCAGAGAACA                |
|                 |             | R-Primer    | TGGTGTCGTGGAGTCG                              |
| bta-miR-433     | MI0009832   | RT-Primer   | CTCAACTGGTGTCGTGGAGTCGGCAATTCAGTTGAG ACACCGAG |
|                 |             | F-Primer    | ACACTCCAGCTGGGATCATGATGGGCTCCT                |
|                 |             | R-Primer    | TGGTGTCGTGGAGTCG                              |

|                |                |                                   |                                                                                                      |
|----------------|----------------|-----------------------------------|------------------------------------------------------------------------------------------------------|
| bta-miR-485    | MI0009842      | RT-Primer<br>F-Primer<br>R-Primer | CTCAACTGGTGTCGTGGAGTCGGCAATTCAGTTGAG CGAATTCA<br>ACACTCCAGCTGGGAGAGGCTGGCCGTGATG<br>TGGTGTCGTGGAGTCG |
| bta-miR-487b   | MI0005060      | RT-Primer<br>F-Primer<br>R-Primer | CTCAACTGGTGTCGTGGAGTCGGCAATTCAGTTGAGAAGTGGAT<br>ACACTCCAGCTGGGAATCGTACAGGGTCAT-3<br>TGGTGTCGTGGAGTCG |
| bta-miR-493    | MI0009847      | RT-Primer<br>F-Primer<br>R-Primer | CTCAACTGGTGTCGTGGAGTCGGCAATTCAGTTGAGCCTGGCAC<br>ACACTCCAGCTGGGTGAAGGTCTACTGTGT<br>TGGTGTCGTGGAGTCG   |
| bta-miR-495    | MI0009849      | RT-Primer<br>F-Primer<br>R-Primer | CTCAACTGGTGTCGTGGAGTCGGCAATTCAGTTGAGAAGAAGTG<br>ACACTCCAGCTGGGAAACAAACATGGTGCA<br>TGGTGTCGTGGAGTCG   |
| bta-miR-665    | MI0009882      | RT-Primer<br>F-Primer<br>R-Primer | CTCAACTGGTGTCGTGGAGTCGGCAATTCAGTTGAG AGGGGCCT<br>ACACTCCAGCTGGGACCAGTAGGCCGAG<br>TGGTGTCGTGGAGTCG    |
| bta-miR-151-5p | MI0004738      | RT-Primer<br>F-Primer<br>R-Primer | CTCAACTGGTGTCGTGGAGTCGGCAATTCAGTTGAGACTAGACT<br>ACACTCCAGCTGGGTCGAGGAGCTCACAG<br>TGGTGTCGTGGAGTCG    |
| U6             | NR_004394.1    | RT-Primer<br>F-Primer<br>R-Primer | AACGCTTCACGAATTTGCGT<br>CTCGCTTCGGCAGCACA<br>AACGCTTCACGAATTTGCGT                                    |
| CELF3          | NM_001076845.1 | F-Primer<br>R -Primer             | CAACAGCAGCAGCAGCAA<br>ACATCTGGAGGATCTCTGAGTC                                                         |

|               |                |                      |                                                 |
|---------------|----------------|----------------------|-------------------------------------------------|
| <i>SIDT2</i>  | NM_001024530.3 | F-Primer<br>R-Primer | GCTCTGTGGAGGAAGATGACTA<br>AGGTATTGCTTGGTGCGAATG |
| <i>GRIN2A</i> | XM_024985455.1 | F-Primer<br>R-Primer | GCCTTCTTCGCCGTCATCT<br>GGAATAGTCGTGAGGTCTCTGAA  |
| <i>ASCC2</i>  | NM_001015524.1 | F-Primer<br>R-Primer | TGAGTACGACGACACATACGA<br>TAGCCTCCTCCTCCTCTTCC   |
| <i>DYNLL2</i> | NM_001113303.1 | F-Primer<br>R-Primer | CACGCAGGCTATGGAGAAGTA<br>TCTTGATGTAGGCAGCAATGTC |
| <i>FAM83F</i> | XM_002687938.6 | F-Primer<br>R-Primer | AACCTCCTCCTCCTCCTGAC<br>GCTGGTACAAGTTCACCTCCT   |
| <i>SLC1A4</i> | NM_001081577.1 | F-Primer<br>R-Primer | CTGGCTGTGGACTGGATTGT<br>TGATTCAAGGTGGTGGAGGATG  |
| <i>TAL1</i>   | NM_001192495.2 | F-Primer<br>R-Primer | GCGGCAGCAGAATGTGAAC<br>CCTCCTCCTCCTGGTCATTG     |
| <i>ATOH8</i>  | NM_001193104.3 | F-Primer<br>R-Primer | CAGGTGCCGTGTTACTCATAC<br>GCCAGGGACAGGATGTAGTT   |
| <i>HNF4A</i>  | NM_001015557.1 | F-Primer<br>R-Primer | CCTCAGCAACGGACAGATGT<br>CTTGACGATGGTGGCAATAGC   |
| <i>NIPAL4</i> | XM_015472345.2 | F-Primer<br>R-Primer | ATCAGCACTCAGGTCAACTTC<br>TGGAGGAGGTCATCACTGTC   |
| <i>SEMA4G</i> | NM_001101117.2 | F-Primer<br>R-Primer | GTGACCAGCCATCCAACCT<br>TTCAGCATAGCAGCCGTAGT     |
| <i>BSN</i>    | XM_024983183.1 | F-Primer<br>R-Primer | ACAGCGACAGCGACTACAG<br>CCAGGTCTGACTCCACATCC     |
| <i>PDE10A</i> | XM_024997131.1 | F-Primer<br>R-Primer | TTGATGATGACCGCCTGTGA                            |

|                |                |          |                       |
|----------------|----------------|----------|-----------------------|
|                |                |          | CCTCGTCCTTCTTGTCTCTGT |
| <i>ZMIZ2</i>   | NM_001205533.1 | F-Primer | GCCATCCACCGACTTCACT   |
|                |                | R-Primer | GCTCCTGACTCTGCTTCTCC  |
| <i>UBN1</i>    | NM_001205922.1 | F-Primer | TGAGCAGCGTGACATCGT    |
|                |                | R-Primer | GAAGACAGCAGGTTCAAGGAT |
| <i>GAPDH</i>   | NM_001034034.2 | F-Primer | GTTTGTGATGGGCGTGAAC   |
|                |                | R-Primer | ATGGACCTGGGTCATGAGT   |
| <i>SMAD1</i>   | NM_001076223.2 | F-Primer | CCATTGGAATGCTGCGAGTT  |
|                |                | R-Primer | AGGCTGTGCTGAGGATTGTAT |
| <i>WNT9A</i>   | XM_024995391.1 | F-Primer | GCGAGGCTTCAAGGAGACA   |
|                |                | R-Primer | TTGACGAACTTGCTGCTGTAC |
| <i>β-actin</i> | NM_173979.3    | F-Primer | AGAGCAAGAGAGGCATCC    |
|                |                | R-Primer | TCGTTGTAGAAGGTGTGGT   |

**Table S2.** Details of sequencing data by RNA-seq

| Samples | Total Reads | Clean Reads | UniqueMapped | ReadsFilter% | UniqueMappedRat% |
|---------|-------------|-------------|--------------|--------------|------------------|
| I1      | 52,246,126  | 51,617,112  | 44,214,723   | 0.988        | 85.7             |
| I2      | 54,526,368  | 53,850,456  | 46,284,731   | 0.988        | 86.0             |
| I3      | 54,526,368  | 53,857,862  | 46,081,945   | 0.988        | 85.6             |
| M1      | 54,259,542  | 53,610,616  | 46,624,308   | 0.988        | 87.0             |
| M2      | 53,161,792  | 52,538,338  | 45,130,866   | 0.988        | 85.9             |
| M3      | 52,817,552  | 52,281,870  | 45,131,041   | 0.989        | 86.3             |

Samples: samples name; I1, I2, I3: immature testicular tissues of Chinese Red Steppes; M1, M2, M3: mature testicular tissues of Chinese Red Steppes.

**Table S3.** Details of sequencing data by Solexa

| Samples | Total Reads | Clean Reads | UniqueMapped | ReadsFilter% | UniqueMappedRat% |
|---------|-------------|-------------|--------------|--------------|------------------|
|---------|-------------|-------------|--------------|--------------|------------------|

|   |           |           |      |       |      |
|---|-----------|-----------|------|-------|------|
| I | 6,000,000 | 5,354,600 | 97.2 | 0.892 | 35.5 |
| M | 6,000,000 | 5,737,270 | 98.5 | 0.956 | 83.1 |

Note: UniqueMapped: Unique mapped reads of the genome; UniqueMappedRat%: Unique mapped ratio of the genome.
